# Supplementary material for: Effect of a novel compound as dietary supplement on growth of decapod crustaceans
Source: Royal Society of Chemistry journal article supplement (doi:10.1039/c5ra10002j), 2015-01-01
Supplement: c5ra10002j1.pdf [file c5ra10002j1.pdf]

## Supporting Information

### **Effect of a Novel Compound as Dietary Supplement on Growth of Decapod Crustaceans**

**Sajal Shrivastava, S. Adline Prinzy\***

Quorum Sensing Laboratory, Centre for Research on Infectious Diseases (CRID), School of Chemical and Biotechnology, SASTRA University, Thanjavur-613401, Tamil Nadu, India.

---

\* Corresponding author

Phone: +91 4362 264101, Fax: +91 4362 264120

E. Mail: [adlineprinzy@biotech.sastra.edu](mailto:adlineprinzy@biotech.sastra.edu)

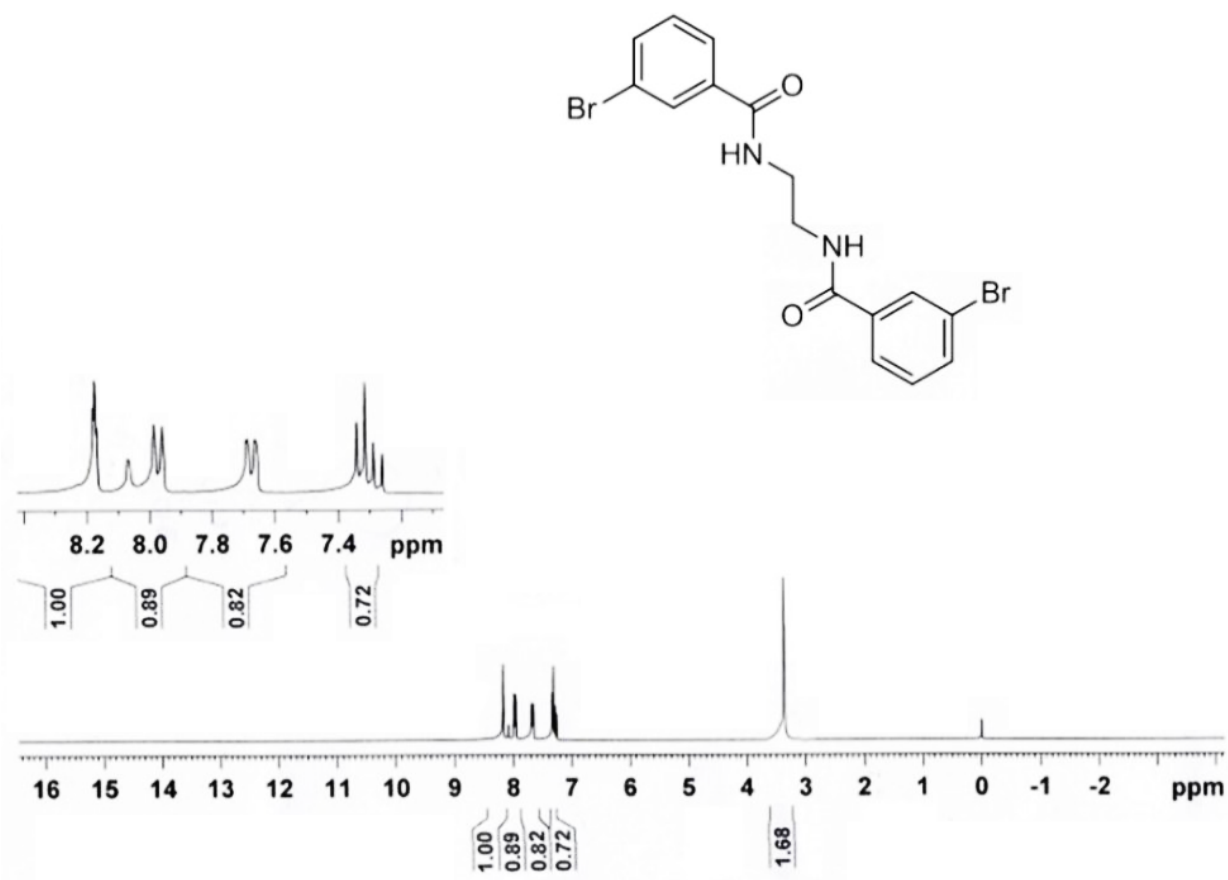

**Fig. S1. Characterization of CGE-1 using <sup>1</sup>H NMR Spectra.** The distribution of characteristic aromatic and aliphatic protons according to their occurrence in those regions was confirmed with proton NMR.

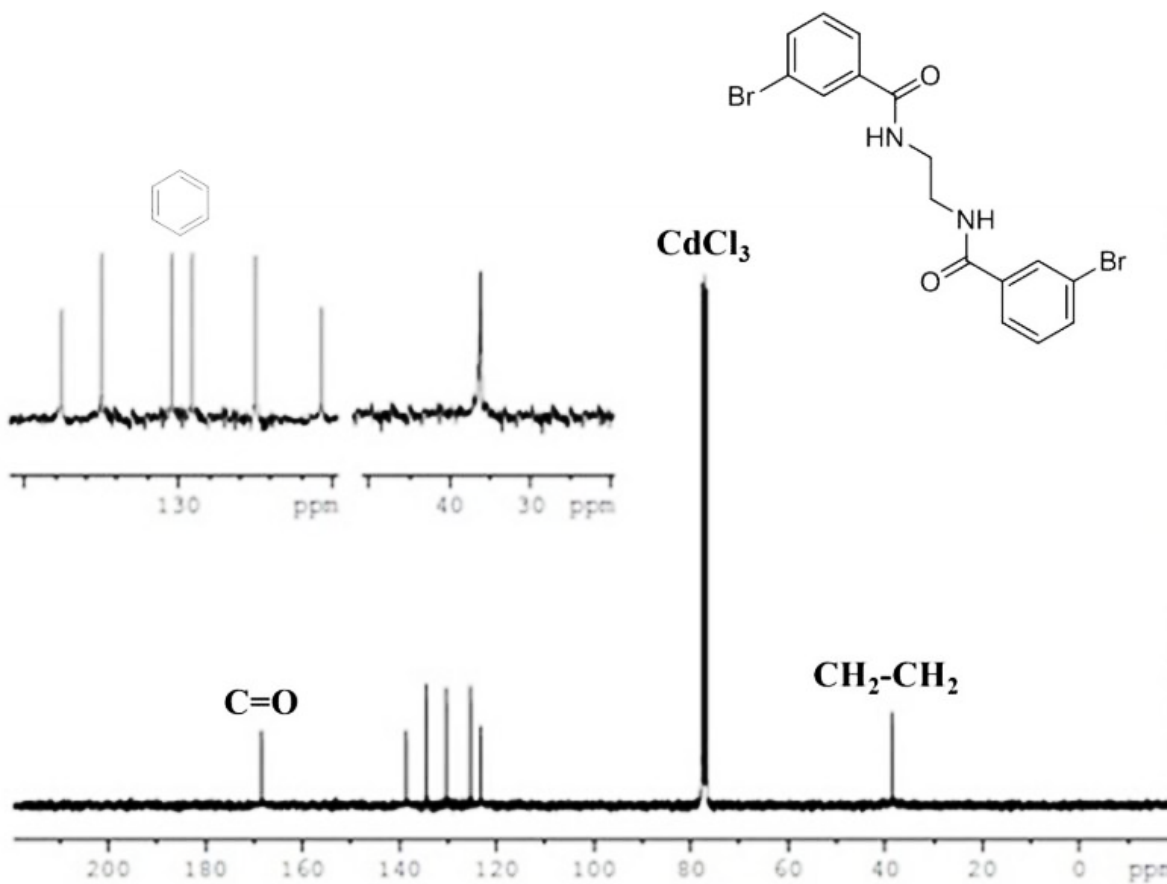

**Fig. S2.**  $^{13}\text{C}$  NMR Spectra of CGE-1. The carbon NMR spectrum was used to confirm the two benzene rings along with the diamine aliphatic region according to their prediction space in the spectra.

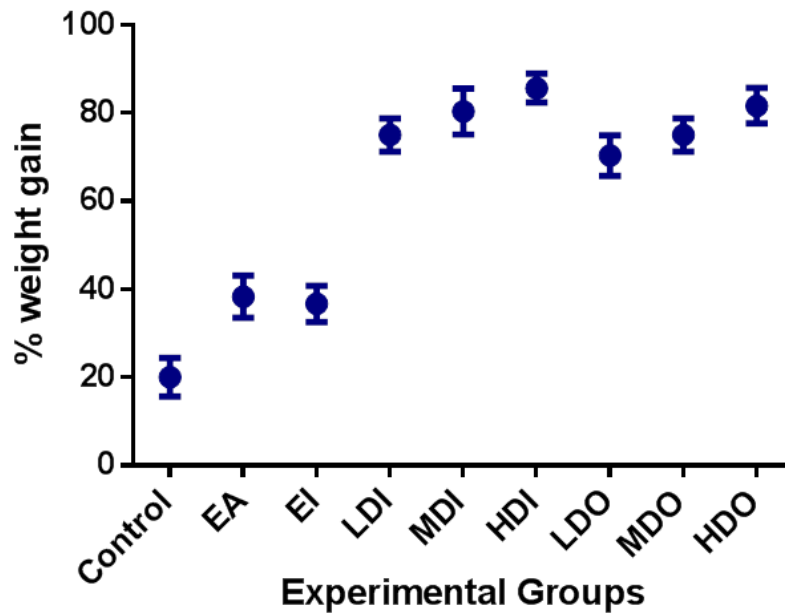

**Fig. S3.** The changes in mean weight gain (%) for the experimental groups of *P. homarus*. Both sets of treated groups gained significantly more weight than the respective sets of control groups (data represented as mean  $\pm$  SEM where  $P < 0.001$  and  $n = 10$  for both 'oral' and 'injected' groups).

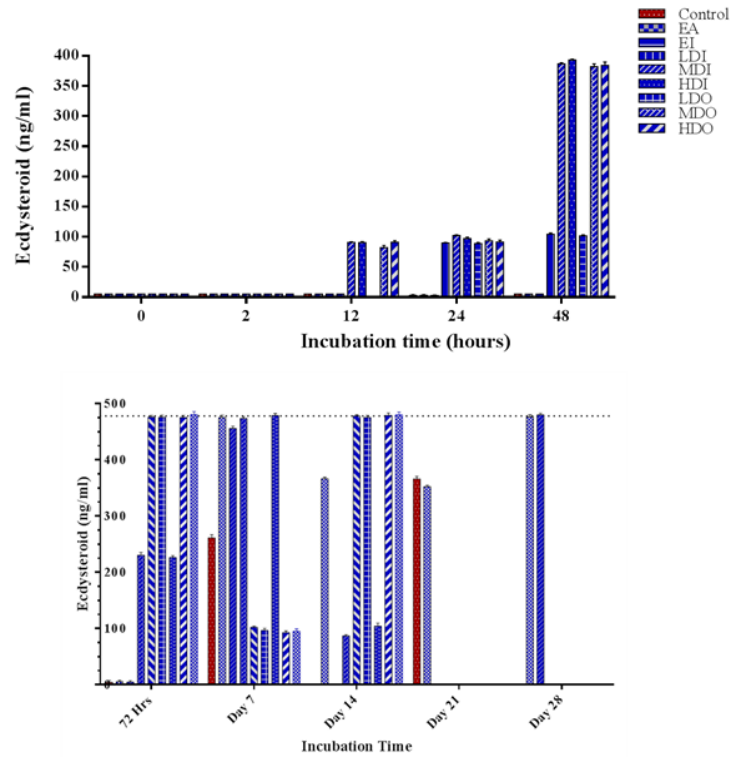

**Fig. S4. Changes in hemolymph ecdysteroid concentration (20E) titer during different molting stages.** 20E, Growth enhancer and eyestalk ablation (EA) caused a large, ephemeral increase in ecdysteroid concentration in the hemolymph (values are represented as mean  $\pm$  SEM, n=10). Lobsters were sampled at various time intervals and ecdysteroid was quantified by enzyme-immunoassay (EIA). The dotted line represents the significant increase in the ecdysteroid titer before Ecdysis.

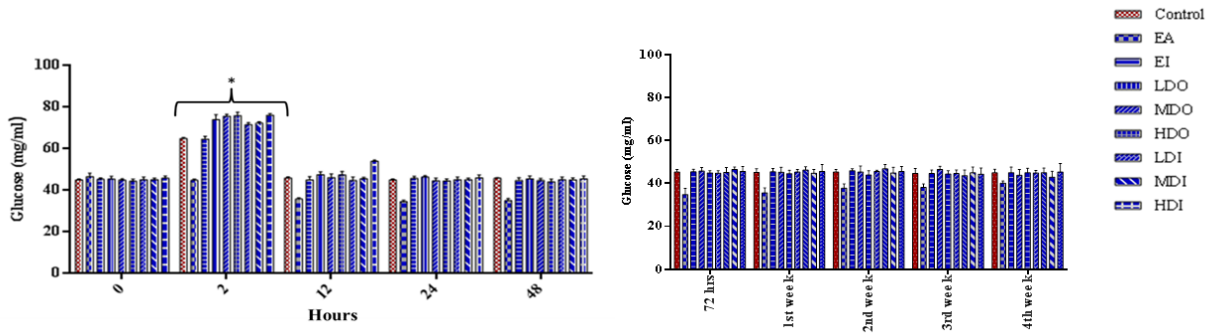

**Fig. S5. Time course activity of CGE-1, 20E and eyestalk ablation on hemolymph glucose titers in *Panulirus homarus* in relation to controls.** Values are expressed as means  $\pm$  SD. The level of hemolymph glucose in the eyestalk ablated group was significantly lower compared to eyestalk intact lobsters ( $p < 0.001$ ). Asterisk represents a maximum hemolymph glucose level was observed at 2h after initiating the experiment.

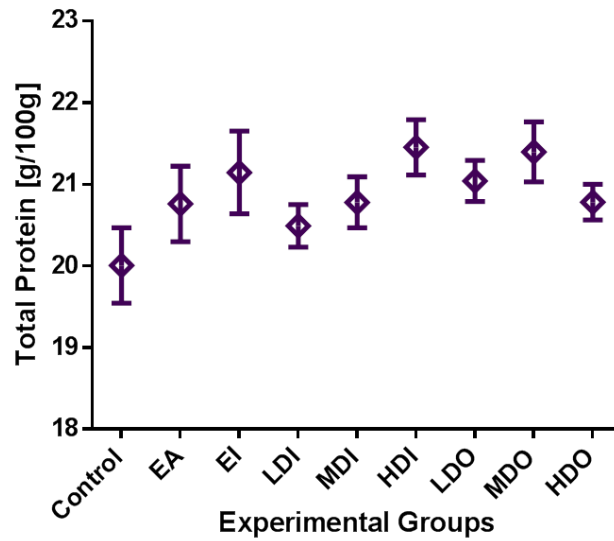

**Fig. S6. Relative changes in total protein from muscle.** The treatment of CGE-1 led to an enhanced protein synthesis capacity as compared to control. Increased muscle protein content under CGE-1 administration suggests an affinity growth of tail muscle without causing damage in its structure. Results are expressed as the standard error of the mean, where n=10 ( $P < 0.001$ ).

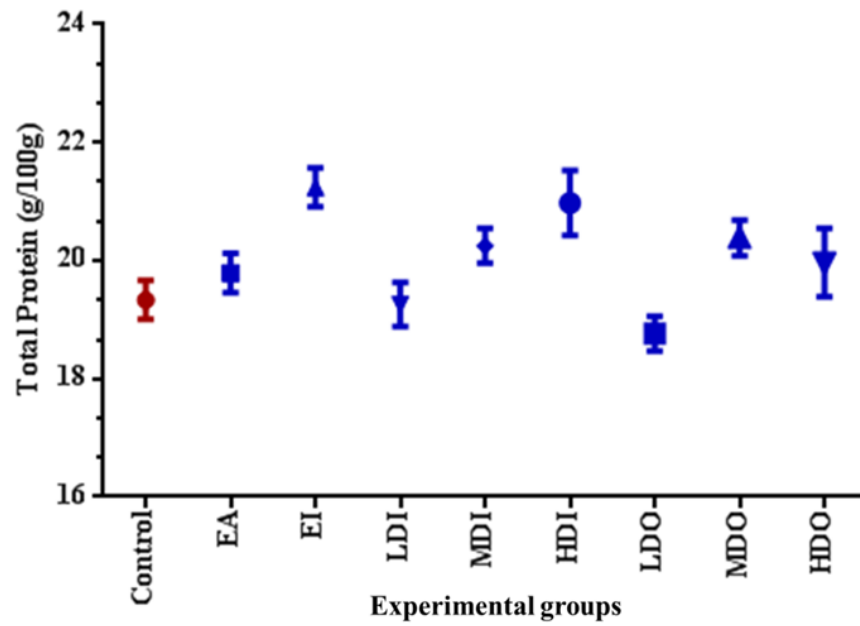

**Fig. S7. A group based differences of hepatopancreas protein concentration (g/100g) in *P. homarus*.** Muscle protein concentration differed significantly among the experimental groups (data represented as mean  $\pm$  SEM, n=10, P<0.0001).



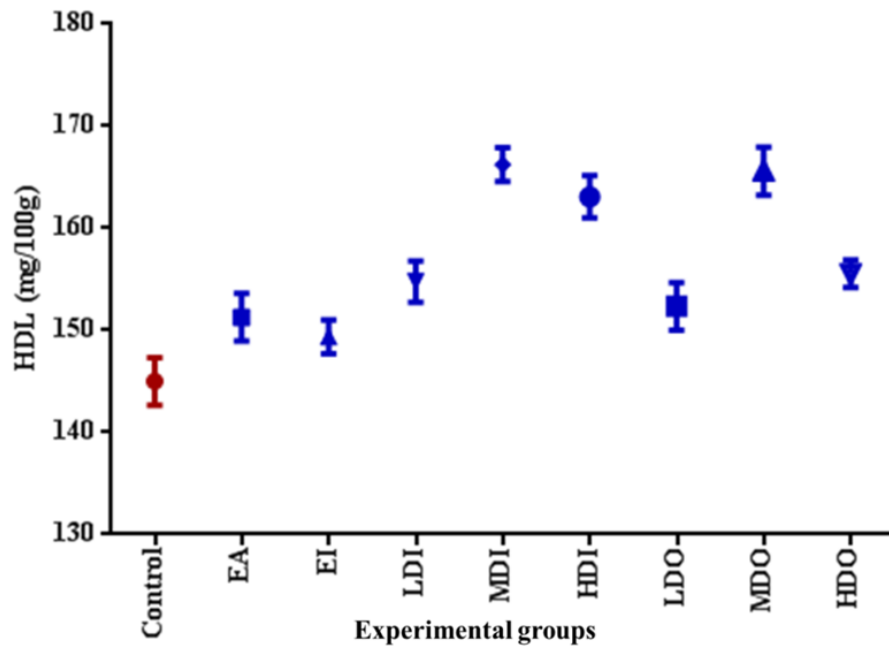

**Fig. S8. Post experimental HDL quantification from hepatopancreas of *P. homarus*.** There was a marked increase in the amount of lipoproteins when compared to control group HDL content. Such a difference was observed in both oral and injected groups. Results are expressed as the mean  $\pm$  SEM (n=10, P<0.001).
